# Supplementary material for: Reciprocally inhibitory circuits operating with distinct mechanisms are differently robust to perturbation and modulation
Source: eLife. 2022 Feb 1;11:e74363. doi: 10.7554/eLife.74363 (PMC8884723; doi:10.7554/eLife.74363)
Supplement: Supplementary file 1. — (a) Mean ± SD of output characteristics of the circuits in escape and release at 10°C and 20°C. (b) Significance analysis of the cycle frequency, spike frequency, number of spikes per burst, slow wave amplitude, duty cycle and ERQ at 10°C and 20°C. (c-h) Significance analysis of the change in the output characteristics of the circuits in escape and release with different temperature-dependencies. [file elife-74363-supp1.docx]

**Supplementary File 1**

**Supplementary File 1a**

|  | **Escape** | | | | | | **Release** | | | | | |
| --- | --- | --- | --- | --- | --- | --- | --- | --- | --- | --- | --- | --- |
|  | **10oC** | | | **20oC** | | | **10oC** | | | **20oC** | | |
|  |  | **for** |  |  | **for** |  |  | **for** |  |  | **for** |  |
| **Cycle freq, Hz** |  |  |  |  |  |  |  |  |  |  |  |  |
| **Spike freq, Hz** |  |  |  |  |  |  |  |  |  |  |  |  |
| **Amplitude, mV** |  |  |  |  |  |  |  |  |  |  |  |  |
| **# spikes/burst** |  |  |  |  |  |  |  |  |  |  |  |  |
| **Duty cycle, %** |  |  |  |  |  |  |  |  |  |  |  |  |
| **ERQ** |  |  |  |  |  |  |  |  |  |  |  |  |

**Supplementary File 1b**

| **Paired-samples Wilcoxon signed rank test for cycle frequency at 10oC vs 20oC**   | **Mechanism** |  | **N** | **p-value** | | --- | --- | --- | --- | | **Escape** |  | 11 | .100 | |  | 4 | .144 | |  | 3 | .109 | | **Release** |  | 6 | **.028** | |  | 5 | **.043** | |  | 4 | .144 | | **Paired-samples Wilcoxon signed rank test for spike frequency at 10oC vs 20oC**   | **Mechanism** |  | **N** | **p-value** | | --- | --- | --- | --- | | **Escape** |  | 21 | **<.001** | |  | 8 | **.012** | |  | 6 | **.028** | | **Release** |  | 12 | **.003** | |  | 10 | **.005** | |  | 8 | **.012** | |
| --- | --- | --- | --- | --- | --- | --- | --- | --- | --- | --- | --- | --- | --- | --- | --- | --- | --- | --- | --- | --- | --- | --- | --- | --- | --- | --- | --- | --- | --- | --- | --- | --- | --- | --- | --- | --- | --- | --- | --- | --- | --- | --- | --- | --- | --- | --- | --- | --- | --- |
| **Paired-samples Wilcoxon signed rank test for # spikes/burst at 10oC vs 20oC**   | **Mechanism** |  | **N** | **p-value** | | --- | --- | --- | --- | | **Escape** |  | 21 | **<.001** | |  | 8 | **0.018** | |  | 6 | .246 | | **Release** |  | 12 | **.041** | |  | 10 | **.005** | |  | 8 | **.018** | | **Paired-samples Wilcoxon signed rank test for amplitude at 10oC vs 20oC**   | **Mechanism** |  | **N** | **p-value** | | --- | --- | --- | --- | | **Escape** |  | 21 | **.011** | |  | 8 | **.012** | |  | 6 | .075 | | **Release** |  | 12 | **.002** | |  | 10 | **.005** | |  | 8 | **.012** | |
| **Paired-samples Wilcoxon signed rank test for duty cycle at 10oC vs 20oC**   | **Mechanism** |  | **N** | **p-value** | | --- | --- | --- | --- | | **Escape** |  | 21 | .590 | |  | 8 | .123 | |  | 6 | .753 | | **Release** |  | 12 | .388 | |  | 10 | .646 | |  | 8 | **.036** | | **Paired-samples Wilcoxon signed rank test for ERQ at 10oC vs 20oC**   | **Mechanism** |  | **N** | **p-value** | | --- | --- | --- | --- | | **Escape** |  | 21 | **.009** | |  | 8 | **.017** | |  | 6 | .173 | | **Release** |  | 12 | .136 | |  | 10 | .286 | |  | 8 | .575 | |

**Supplementary File 1c** **Supplementary File 1d**   **Supplementary File 1e**

| | **Measure: change in cycle frequency from 10oC to 20oC; Test: One-way ANOVA; F-statistic: F(5,59)=21.790, p<0.001; Post-hoc: Tuckey** | | | | | | | | | --- | --- | --- | --- | --- | --- | --- | --- | |  |  | **Escape** | | | **Release** | | | |  |  |  |  |  |  |  |  | | **Escape** |  |  | .999 | **<.001** | **.014** | **.053** | .540 | | **for** |  |  | **<.001** | .147 | .101 | .864 | |  |  |  |  | **<.001** | **<.001** | **<.001** | | **Release** |  |  |  |  |  | **<.001** | .781 | | **for** |  |  |  |  |  | **.006** | |  |  |  |  |  |  |  |   **Supplementary File 1f** | | **Measure: change in spike frequency from 10oC to 20oC; Test: One-way ANOVA; F-statistic: F(5,59)=9.897, p<0.001; Post-hoc: Tuckey** | | | | | | | | | --- | --- | --- | --- | --- | --- | --- | --- | |  |  | **Escape** | | | **Release** | | | |  |  |  |  |  |  |  |  | | **Escape** |  |  | **.023** | **<.001** | .981 | .580 | **.006** | | **for** |  |  | .276 | **.011** | .660 | .999 | |  |  |  |  | **<.001** | **.007** | .483 | | **Release** |  |  |  |  |  | .324 | **.003** | | **for** |  |  |  |  |  | .397 | |  |  |  |  |  |  |  |   **Supplementary File 1g** | | **Measure: change in # spikes/burst from 10oC to 20oC; Test: One-way ANOVA; F-statistic: F(5,59)=13.949, p<0.001; Post-hoc: Tuckey** | | | | | | | | | --- | --- | --- | --- | --- | --- | --- | --- | |  |  | **Escape** | | | **Release** | | | |  |  |  |  |  |  |  |  | | **Escape** |  |  | .229 | .999 | .286 | **<.001** | .279 | | **for** |  |  | .354 | **.005** | **.020** | 1.00 | |  |  |  |  | .818 | **<.001** | .391 | | **Release** |  |  |  |  |  | **<.001** | **.007** | | **for** |  |  |  |  |  | **.015** | |  |  |  |  |  |  |  |   **Supplementary File 1h** |
| --- | --- | --- | --- | --- | --- | --- | --- | --- | --- | --- | --- | --- | --- | --- | --- | --- | --- | --- | --- | --- | --- | --- | --- | --- | --- | --- | --- | --- | --- | --- | --- | --- | --- | --- | --- | --- | --- | --- | --- | --- | --- | --- | --- | --- | --- | --- | --- | --- | --- | --- | --- | --- | --- | --- | --- | --- | --- | --- | --- | --- | --- | --- | --- | --- | --- | --- | --- | --- | --- | --- | --- | --- | --- | --- | --- | --- | --- | --- | --- | --- | --- | --- | --- | --- | --- | --- | --- | --- | --- | --- | --- | --- | --- | --- | --- | --- | --- | --- | --- | --- | --- | --- | --- | --- | --- | --- | --- | --- | --- | --- | --- | --- | --- | --- | --- | --- | --- | --- | --- | --- | --- | --- | --- | --- | --- | --- | --- | --- | --- | --- | --- | --- | --- | --- | --- | --- | --- | --- | --- | --- | --- | --- | --- | --- | --- | --- | --- | --- | --- | --- | --- | --- | --- | --- | --- | --- | --- | --- | --- | --- | --- | --- | --- | --- | --- | --- | --- | --- | --- | --- | --- | --- | --- | --- | --- | --- | --- | --- | --- | --- | --- | --- | --- | --- | --- | --- | --- | --- | --- | --- | --- | --- | --- | --- | --- | --- | --- | --- | --- | --- | --- | --- | --- | --- | --- | --- |
| | **Measure: change in amplitude from 10oC to 20oC; Test: One-way ANOVA; F-statistic: F(5,59)=50.437, p<0.001; Post-hoc: Tuckey** | | | | | | | | | --- | --- | --- | --- | --- | --- | --- | --- | |  |  | **Escape** | | | **Release** | | | |  |  |  |  |  |  |  |  | | **Escape** |  |  | **<.001** | .406 | **<.001** | **<.001** | **<.001** | | **for** |  |  | .314 | **<.001** | **.002** | .082 | |  |  |  |  | **<.001** | **<.001** | **<.001** | | **Release** |  |  |  |  |  | **<.001** | **<.001** | | **for** |  |  |  |  |  | .853 | |  |  |  |  |  |  |  | | | **Measure: change in duty cycle from 10oC to 20oC; Test: One-way ANOVA; F-statistic: F(5,59)= 0.964, p=0.447; Post-hoc: Tuckey** | | | | | | | | | --- | --- | --- | --- | --- | --- | --- | --- | |  |  | **Escape** | | | **Release** | | | |  |  |  |  |  |  |  |  | | **Escape** |  |  | .821 | 1.00 | .961 | .939 | .964 | | **for** |  |  | .865 | .489 | .999 | .999 | |  |  |  |  | .999 | .948 | .964 | | **Release** |  |  |  |  |  | .647 | .729 | | **for** |  |  |  |  |  | .000 | |  |  |  |  |  |  |  | | | **Measure: change in ERQ from 10oC to 20oC; Test: One-way ANOVA; F-statistic: F(5,59)=4.076, p=0.003; Post-hoc: Tuckey** | | | | | | | | | --- | --- | --- | --- | --- | --- | --- | --- | |  |  | **Escape** | | | **Release** | | | |  |  |  |  |  |  |  |  | | **Escape** |  |  | **.019** | **.033** | .970 | 1.00 | .549 | | **for** |  |  | 1.00 | .177 | **.040** | .757 | |  |  |  |  | .208 | **.054** | .747 | | **Release** |  |  |  |  |  | .963 | .942 | | **for** |  |  |  |  |  | .592 | |  |  |  |  |  |  |  | |
