# Supplementary figures and images for: Reciprocally inhibitory circuits operating with distinct mechanisms are differently robust to perturbation and modulation
Source: eLife journal article supplement (doi:10.7554/elife.74363), 2022-02-01

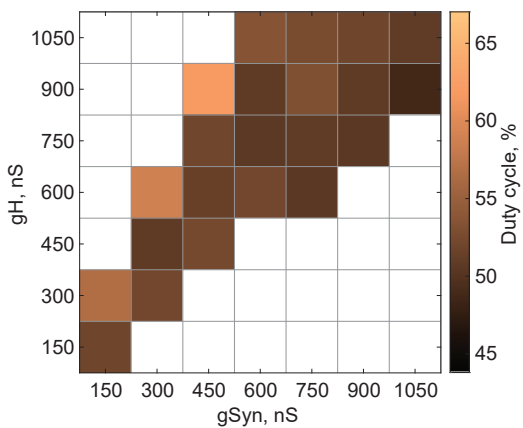

Supplement: supp [file elife_poa_e74363_Figure_3_figure_supplement_1.pdf › elife_poa_e74363_Figure_3_figure_supplement_1.pdf]

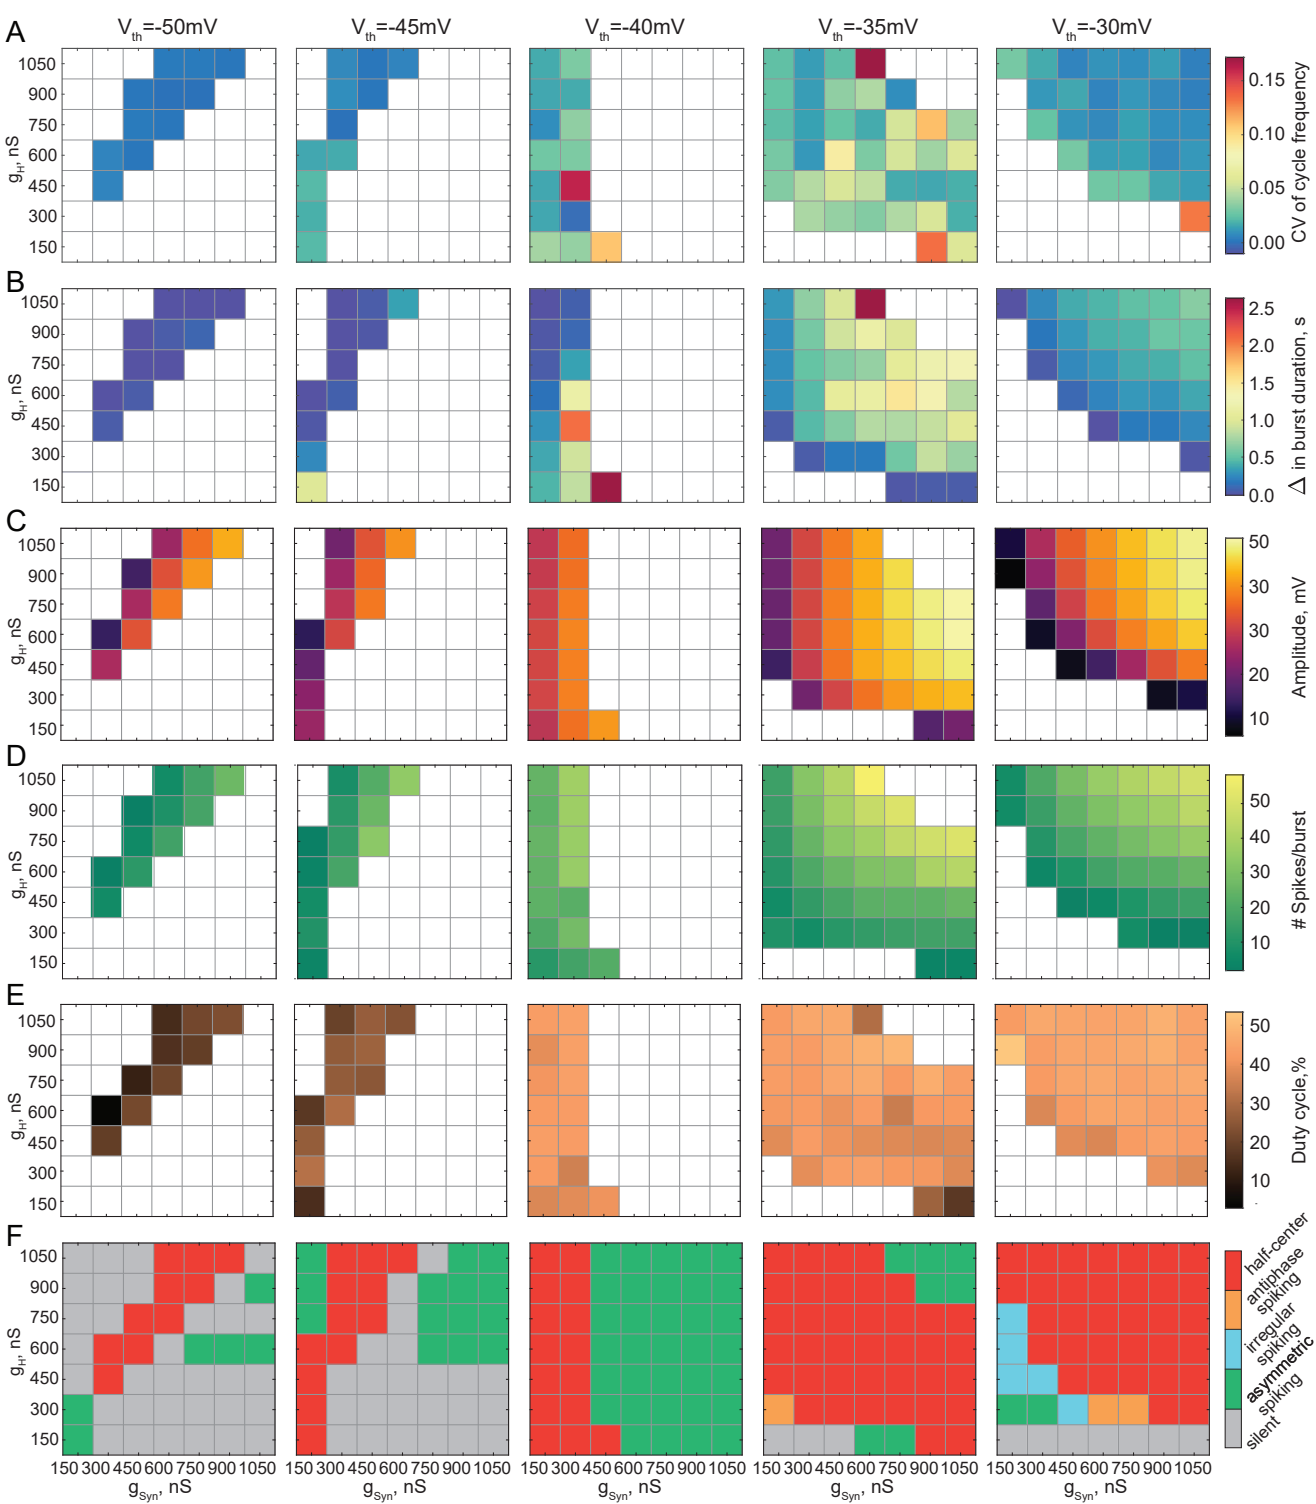

Supplement: supp [file elife_poa_e74363_Figure_4_figure_supplement_1.pdf › elife_poa_e74363_Figure_4_figure_supplement_1.pdf]

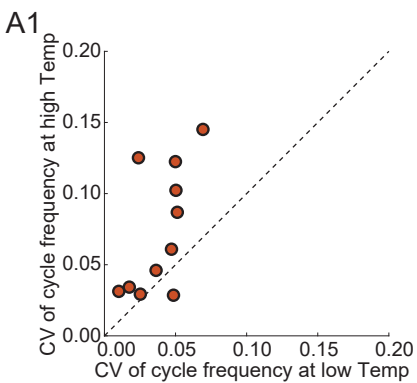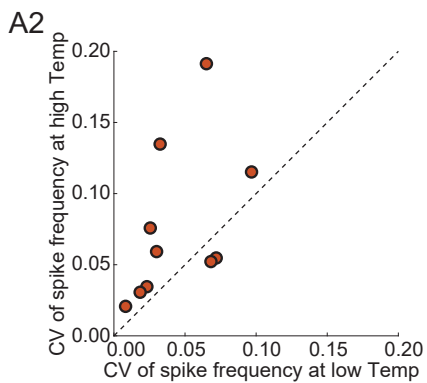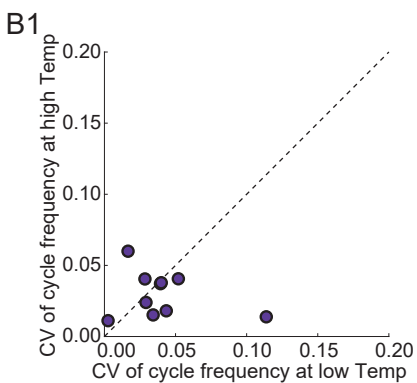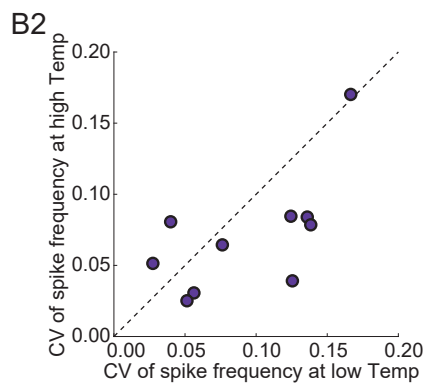

Supplement: supp [file elife_poa_e74363_Figure_5_figure_supplement_1.pdf › elife_poa_e74363_Figure_5_figure_supplement_1.pdf]

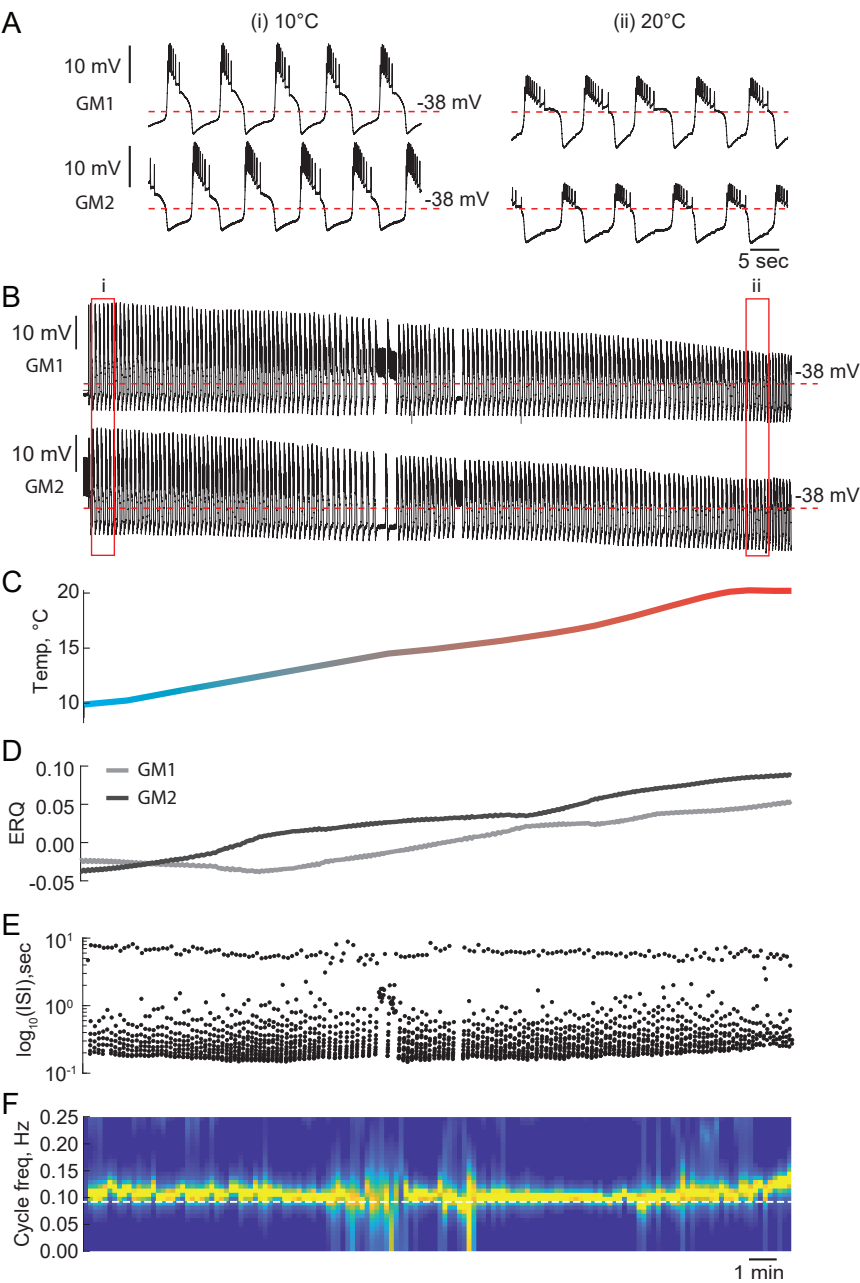

Supplement: supp [file elife_poa_e74363_Figure_7_figure_supplement_1.pdf › elife_poa_e74363_Figure_7_figure_supplement_1.pdf]

A

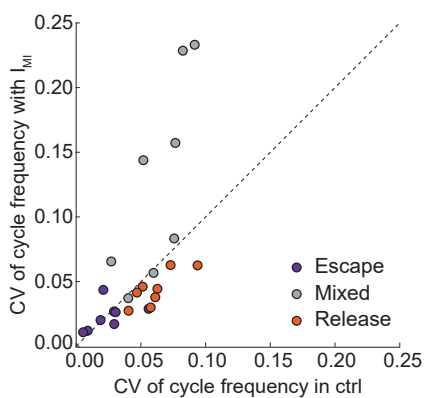

B

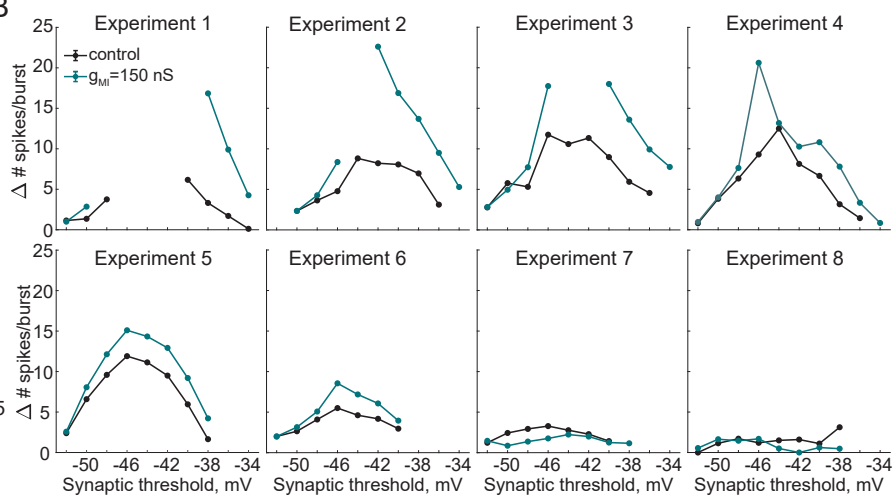

Supplement: supp [file elife_poa_e74363_Figure_figure_supplement_1.pdf › elife_poa_e74363_Figure_figure_supplement_1.pdf]
